# Supplementary material for: Diabetes-Related Symptom Distress in Association With Glucose Metabolism and Comorbidity
Source: Oxford University Press journal article supplement (doi:10.2337/dc08-1074), 2008-08-27
Supplement: dc081074-sup-online_appendix_table_a1.doc [file dc081074-sup-online_appendix_table_a1.doc]

**Online Appendix Table A1.** Characteristics, co-morbidities and diabetes-related symptom distress (DSC-R) scores of the study sample by glucose metabolism status.

|  | NGM  (n=281) | IGM  (n=181) | DM2  (n=107) | *P* |
| --- | --- | --- | --- | --- |
| **Characteristics** |  |  |  |  |
| Age (years) | 68.7 ± 6.1 | 70.1 ± 6.4 | 72.0 ± 6.8 | 0.000 |
| Sex (% male) | 48.8 | 50.3 | 48.6 | 0.941 |
| BMI (kg/m2) | 26.2 ± 3.3 | 27.9 ± 4.0 | 28.7 ± 4.3 | 0.000 |
| Diastolic blood pressure (mmHg) | 81.5 ± 11.3 | 83.0 ± 10.8 | 85.5 ± 11.3 | 0.006 |
| Systolic blood pressure (mmHg) | 137.5 ± 20.4 | 143.0 ± 18.5 | 152.0 ± 21.9 | 0.000 |
| Hypertension (%) | 55.7 | 73.5 | 90.5 | 0.000 |
| Fasting plasma glucose (mmol/l) | 5.4 ± 0.4 | 6.1 ± 0.5 | 7.7 ± 1.7 | 0.000 |
| 2-h post-load plasma glucose (mmol/l) | 5.6 ± 1.2 | 8.0 ± 1.7 | 11.4 ± 2.6 | 0.000 |
| **Co-morbidities** |  |  |  |  |
| Ischemic heart disease * (%) | 33.8 | 39.5 | 40.8 | 0.319 |
| Prevalent cardiovascular disease † (%) | 17.1 | 19.3 | 16.1 | 0.770 |
| Neuropathy (%) | 48.1 | 49.2 | 48.8 | 0.997 |
| Retinopathy (%) | 10.3 | 12.3 | 10.5 | 0.904 |
| Microalbuminuria (%) | 10.3 | 14.4 | 24.8 | 0.001 |
| Depression (% CES-D score ≥ 16) | 13.3 | 9.8 | 20.0 | 0.065 |
| **DSC-R (range 0-100)** ‡ |  |  |  |  |
| Hyperglycemic | 6.3, 0.0, 12.5 | 7.4, 0.0, 6.3 | 8.2, 6.3, 12.5 | 0.337 |
| Hypoglycemic | 5.1, 0.0, 8.3 | 5.2, 0.0, 8.3 | 6.2, 0.0, 8.3 | 0.651 |
| Neuropathic pain | 4.8, 0.0, 6.3 | 4.7, 0.0, 6.3 | 7.4, 0.0, 12.5§ | 0.102 |
| Sensibility | 4.4, 0.0, 4.2 | 5.1, 0.0, 8.3 | 6.7, 0.0, 8.3|| | 0.134 |
| Fatigue | 11.9, 6.3, 18.8 | 12.1, 6.3, 18.8 | 15.7, 6.3, 25.0 | 0.109 |
| Cognitive distress | 6.5, 0.0, 6.3 | 7.5, 0.0, 12.5 | 8.7, 0.0, 12.5 | 0.268 |
| Cardiovascular | 5.8, 0.0, 6.3 | 5.4, 0.0, 6.3 | 7.5, 0.0, 12.5 | 0.210 |
| Ophthalmological | 5.0, 0.0, 5.0 | 5.1, 0.0, 5.0 | 7.1, 0.0, 10.0 | 0.202 |
| DSC-R total score | 6.1, 3.7, 8.5 | 6.5, 4.4, 9.9 | 8.4, 5.9, 11.0|| | 0.046 |

Data of the characteristics and co-morbidities are means ± SD unless otherwise noted; Abbreviations: NGM, normal glucose metabolism; IGT, impaired glucose metabolism; DM2, type 2 diabetes mellitus subjects.

* Based on electrocardiogram-recording.

†Assessed by the Rose questionnaire.

‡Data of the DSC-R are means, median, and 75th percentile.

§ P < 0.05; || P < 0.01 Mann-Whitney *U* tests comparing DM2 and NGM.
